# Supplementary material for: Human Pleural Fluid Elicits Pyruvate and Phenylalanine Metabolism in Acinetobacter baumannii to Enhance Cytotoxicity and Immune Evasion
Source: PubMed Central journal article supplement (PMC6650585; doi:10.3389/fmicb.2019.01581), 2019-07-17

A

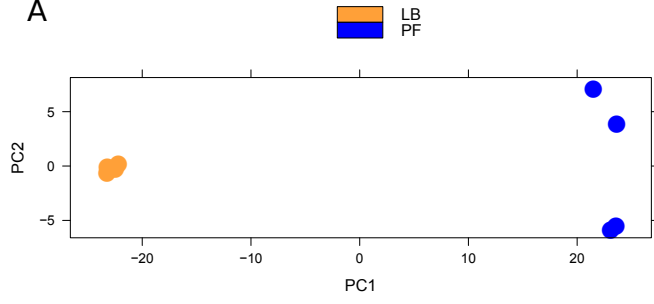

B

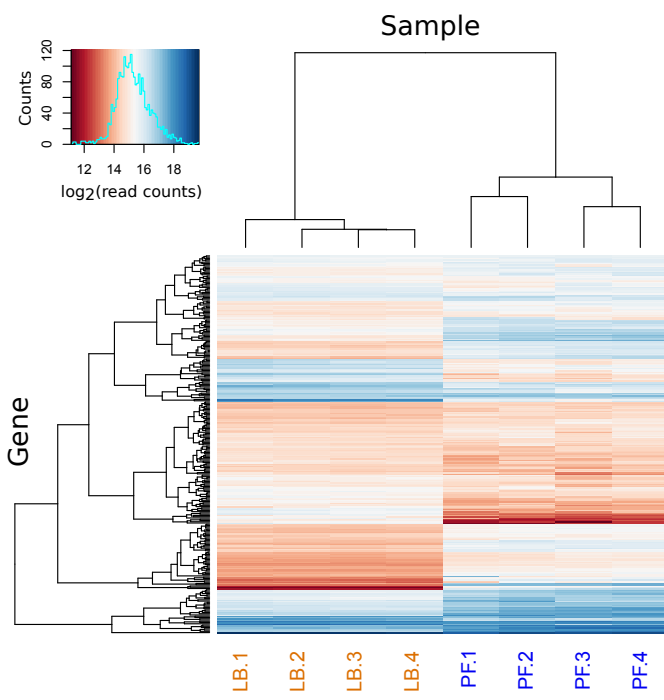

Supplement: Image_1.pdf [file Image_1.pdf]
