# Supplementary material for: Human Pleural Fluid Elicits Pyruvate and Phenylalanine Metabolism in Acinetobacter baumannii to Enhance Cytotoxicity and Immune Evasion
Source: PubMed Central journal article supplement (PMC6650585; doi:10.3389/fmicb.2019.01581), 2019-07-17
Supplement: Image_2.pdf [file Image_2.pdf]

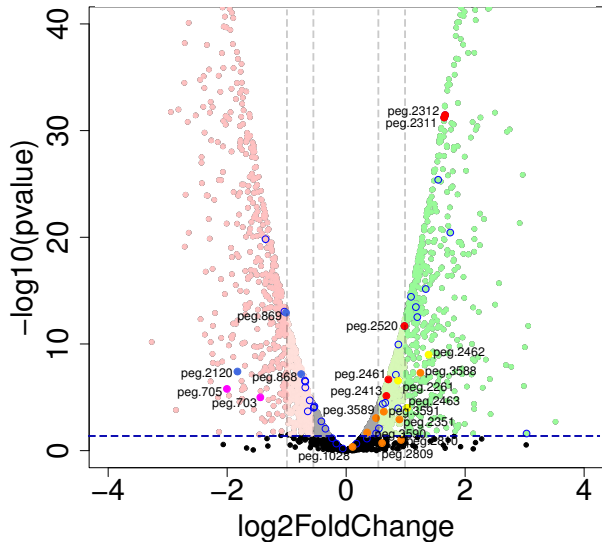

- PDH complex
- Fatty acid synthetic pathway
- Glutamate metabolism
- Phenylalanine metabolism
- Propionate/malonate metabolism
