# Supplementary material for: Human Pleural Fluid Elicits Pyruvate and Phenylalanine Metabolism in Acinetobacter baumannii to Enhance Cytotoxicity and Immune Evasion
Source: PubMed Central journal article supplement (PMC6650585; doi:10.3389/fmicb.2019.01581), 2019-07-17

**(A)**

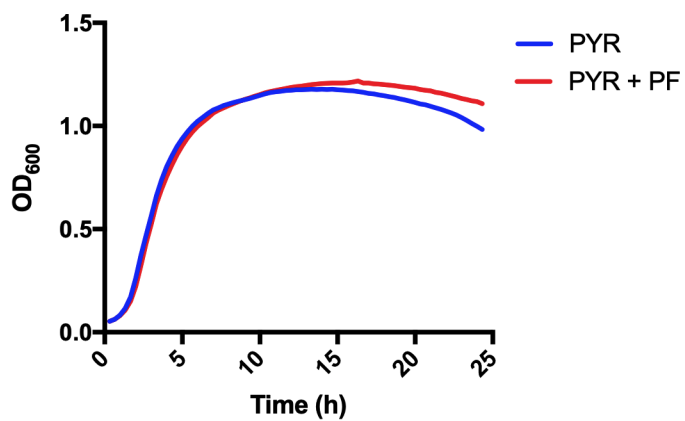

**(B)**

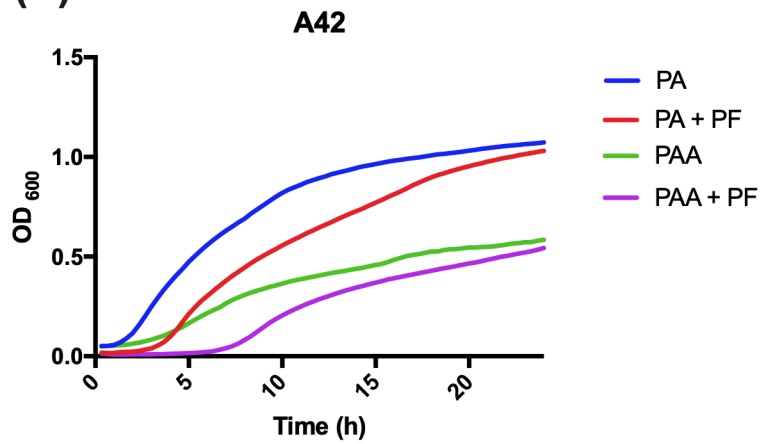

**(C)**

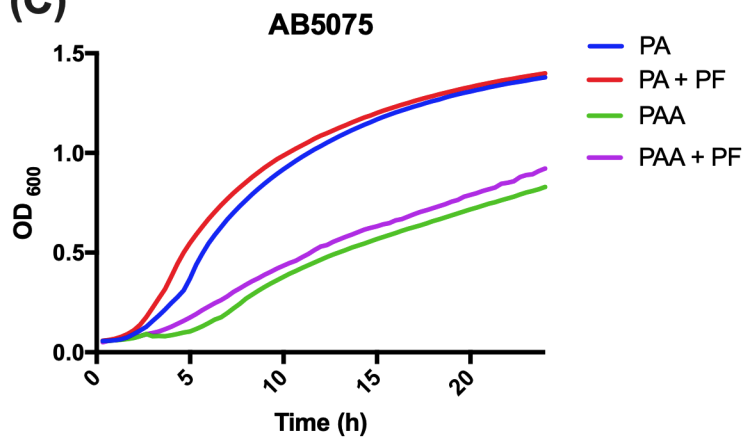

Supplement: Image_3.pdf [file Image_3.pdf]
